# Supplementary material for: Host Specificity of the Parasitic Wasp Anaphes flavipes (Hymenoptera: Mymaridae) and a New Defence in Its Hosts (Coleoptera: Chrysomelidae: Oulema spp.)
Source: MDPI journal article supplement (doi:10.3390/insects11030175), 2020-03-10
Supplement: s1 [file s1]

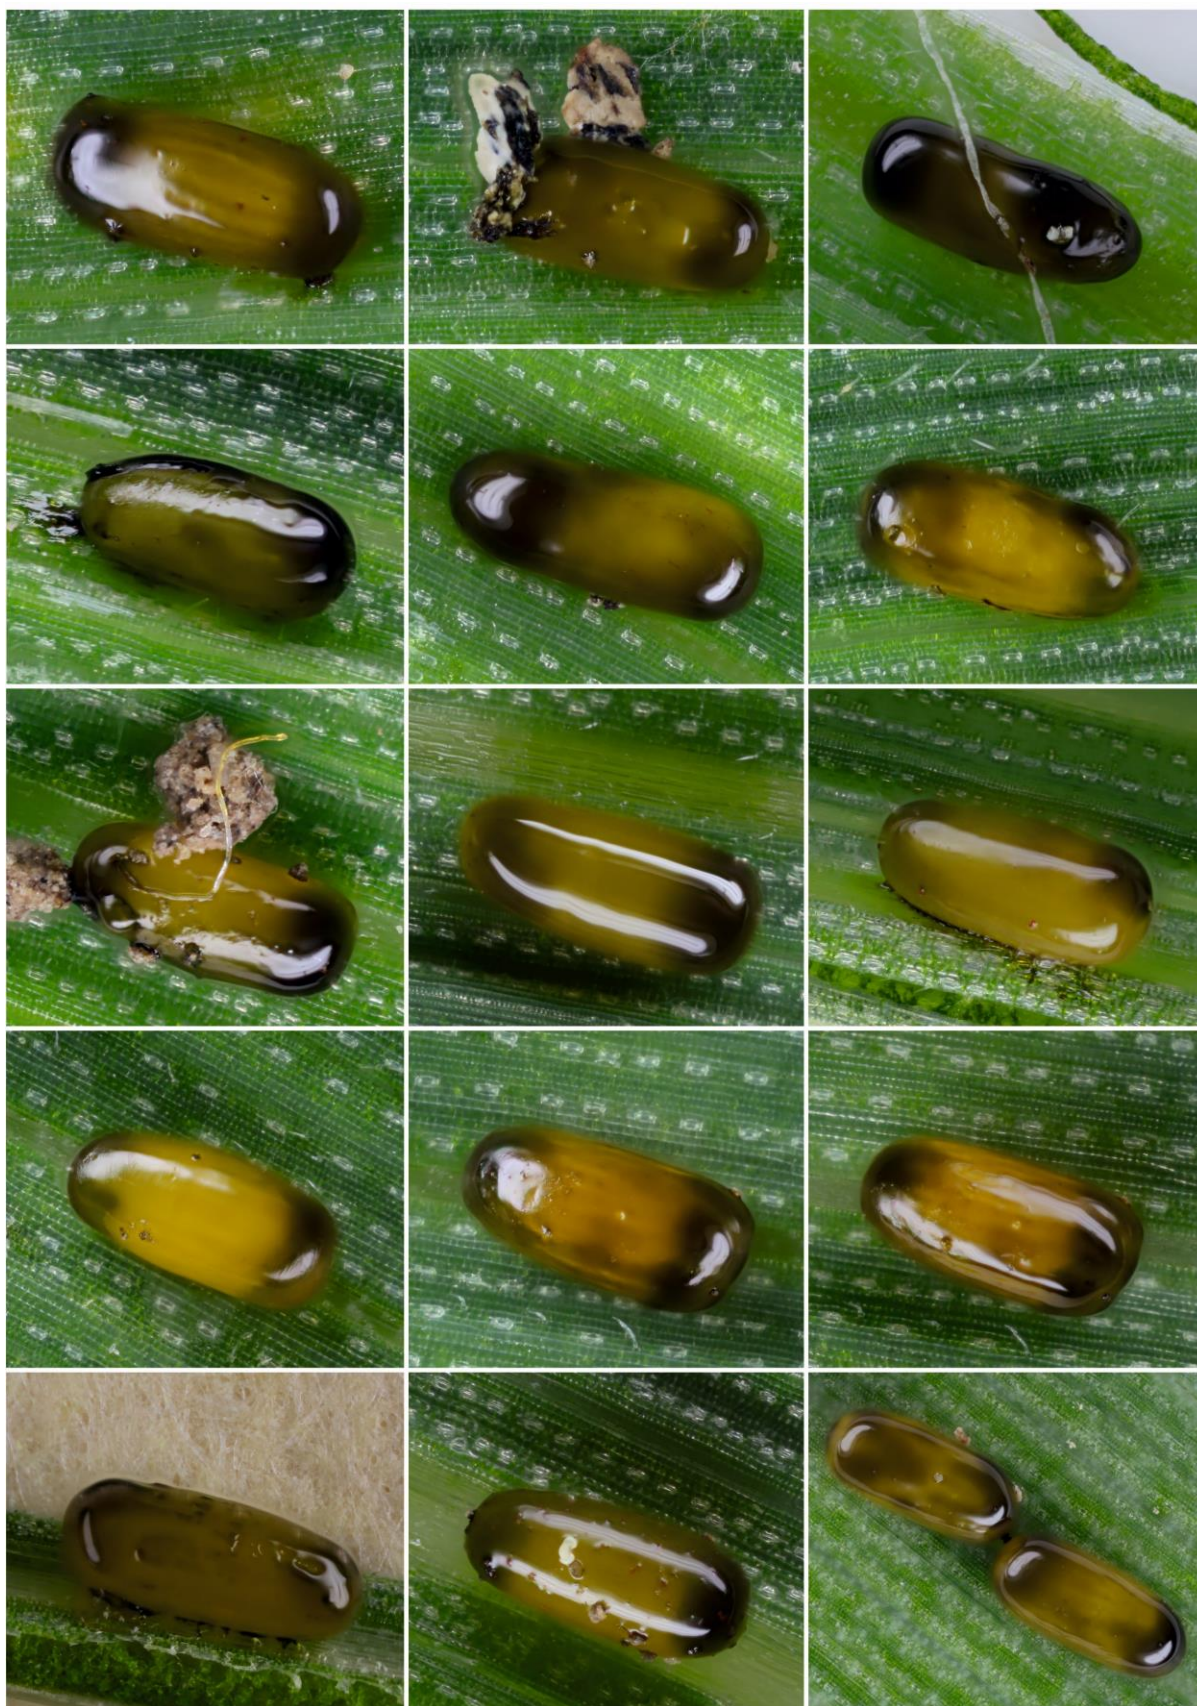

Supplementary Material 3. – The eggs with dark sticky layer (*Oulema gallaeciana* Heyden, 1879 from Czech Republic).
